# Supplementary material for: Inference of Surface Membrane Factors of HIV-1 Infection through Functional Interaction Networks
Source: PubMed Central journal article supplement (PMC2953485; doi:10.1371/journal.pone.0013139), 2010-10-12
Supplement: pone.0013139.s004.pdf [file pone.0013139.s004.pdf]

**Table S2: Average number of proteins (network size) comprised in each network and the number of seeds that are re-discovered during cross-validation when considering different data for generating the specific HIV receptor network.**

| <b>HIV Network Type</b>           | <b>Average Network Size</b> | <b>Number of recovered receptors</b> |
|-----------------------------------|-----------------------------|--------------------------------------|
| PPI Network                       | 89 ( $\pm$ 6)               | 2 of 13                              |
| PPI+GO Network                    | 418 ( $\pm$ 8)              | 11 of 13                             |
| PPI+ GO <sub>enrich</sub> Network | 726 ( $\pm$ 16)             | 12 of 13                             |
