# Supplementary material for: Inference of Surface Membrane Factors of HIV-1 Infection through Functional Interaction Networks
Source: PubMed Central journal article supplement (PMC2953485; doi:10.1371/journal.pone.0013139), 2010-10-12
Supplement: pone.0013139.s006.pdf [file pone.0013139.s006.pdf]

**Table S4. Chromosomal location of known and predicted surface membrane proteins. Similar chromosome regions are colored similarly.**

| <b>Known factors</b> | <b>Chrom. Location</b> | <b>Predicted factors</b> | <b>Chrom. Location</b>       |
|----------------------|------------------------|--------------------------|------------------------------|
| CXCR4                | 2q21                   | CD2                      | 1q13.1                       |
| GPR1                 | 2q33.3                 | DARC                     | 1q21-q22                     |
| ITGA4                | 2q31.3                 | HTR6                     | 1p36-p35                     |
| CCR9                 | 3p21.3                 | CSFR3                    | 1p35-p34.3                   |
| CCR3                 | 3p21.3                 | IL1R1                    | 2q12                         |
| CCR2                 | 3p21.3                 | GPR17                    | 2q21                         |
| CCR5                 | 3p21.31                | CCR1                     | 3p21                         |
| CX3CR1               | 3p21 3p21.3            | CCBP2                    | 3p21.3                       |
| CXCR6                | 3p21                   | RXFP1                    | 4q32.1                       |
| CCR8                 | 3p22                   | GYPB                     | 4q28-q31                     |
| APJ                  | 11q12                  | IL6ST                    | 5q11                         |
| CD4                  | 12pter-p12             | HTR1B                    | 6q13                         |
| DC-SIGN              | 19p13                  | HTR1E                    | 6q14-q15                     |
|                      |                        | TNFRSF3                  | 12p13                        |
|                      |                        | GPR182                   | 12q13.3                      |
|                      |                        | RXFP2                    | 13q13.1                      |
|                      |                        | CD79B                    | 17q23                        |
|                      |                        | CD97                     | 19p13                        |
|                      |                        | TNFRSF5                  | 20q12-q13.2                  |
|                      |                        | NPBWR2                   | 20q13.3                      |
|                      |                        | GP1BB                    | 22q11.21-<br>q11.23 22q11.21 |
