# Supplementary material for: Inference of Surface Membrane Factors of HIV-1 Infection through Functional Interaction Networks
Source: PubMed Central journal article supplement (PMC2953485; doi:10.1371/journal.pone.0013139), 2010-10-12
Supplement: pone.0013139.s008.pdf [file pone.0013139.s008.pdf]

**Table S6: List of the potential HIV surface membrane factors inferred by our method, including their functional domains, cell types and references assessing an association with HIV.**

| Receptor | InterPro domains                                                                                                       | Cell types                                                                                          | Association with HIV |
|----------|------------------------------------------------------------------------------------------------------------------------|-----------------------------------------------------------------------------------------------------|----------------------|
| DARC     | Duffy_cmk_rcpt.                                                                                                        | High expression: (early) erythroid, endothelial cells                                               | + [1-3]              |
| CCR1     | 7TM_GPCR_Rhodpsn, CC_1_rcpt                                                                                            | High expression: whole blood, monocytes, myeloid, dendritic cell                                    | + [4-6]              |
| CCBP2    | 7TM_GPCR_Rhodpsn, CXC_4_rcpt                                                                                           | Uniform expression*                                                                                 | + [7,8]<br>- [9]     |
| CD97     | EGF-type_Asp/Asn_hydroxyl_site, EGF_Ca_bd_2, GPCR_2_CD97, GPCR_2_secretin-like, GPS_dom                                | High expression: CD34, B lymphoblast, dendritic cells, CD8 and CD4 T- cells, NK, myeloid, monocytes | + [10]               |
| GP1BB    | LRR-contain_N, Cys-rich_flank_reg_C                                                                                    | High expression: CD34, monocytes and whole blood                                                    | ?                    |
| HTR6     | 7TM_GPCR_Rhodpsn                                                                                                       | Uniform expression                                                                                  | +                    |
| HTR1B    | 5HT1B_rcpt, 7TM_GPCR_Rhodpsn                                                                                           | Uniform expression                                                                                  | ?                    |
| HTR1E    | 5HT1F_rcpt, 7TM_GPCR_Rhodpsn                                                                                           | Uniform expression                                                                                  | ?                    |
| RXFP2    | 7TM_GPCR_Rhodpsn, LDL_rcpt_classA_cys-rich_rpt, Leu-rich_rpt, LRR-contain_N, Leu-rich_rpt_typical-subtyp, Relaxin_rcpt | Low expression                                                                                      | ?                    |
| RXFP1    | 7TM_GPCR_Rhodpsn, LDL_rcpt_classA_cys-rich, Leu-rich_rpt, LRR-contain_N, Leu-rich_rpt_typical-subtyp, Relaxin_rcpt     | No expression profiles available                                                                    | ?                    |
| GPR17    | 7TM_GPCR_Rhodpsn, P2_purnoceptor                                                                                       | Uniform expression                                                                                  | ?                    |
| GPR182   | 7TM_GPCR_Rhodpsn, G10D_rcpt                                                                                            | Uniform expression                                                                                  | ?                    |
| NPBWR2   | 7TM_GPCR_Rhodpsn, Neuropept_W_rcpt                                                                                     | Uniform expression                                                                                  | - [11]               |
| GYPB     | Glycophorin                                                                                                            | High expression: (early) erythroid and endothelial cells                                            | ?                    |
| CD2      | Ag_CD2, Ig-like_fold, Ig_C2-set, Ig_V-set, T-cell_sdhesion_molc_CD2.                                                   | High expression: dendritic, myeloid, monocytes, NK, CD8 and CD4 T cells, whole blood                | + [12-15]            |

|         |                                                                           |                                                              |           |
|---------|---------------------------------------------------------------------------|--------------------------------------------------------------|-----------|
| CSF3R   | FN_III,<br>Hematopoietin_rcpt_gp130_CS,<br>IgC2-like_lig-bd               | High expression: myeloid cells,<br>monocytes and whole blood | + [16,17] |
| IL1R1   | Ig, Ig-like, Ig-like_fold, Ig_sub,<br>IL1_rcpt_1, IL1R_rcpt               | No expression profile available                              | - [18,19] |
| CD79B   | Ig-like, Ig-like_fold, Ig_sub,<br>Ig_V-set,<br>Phos_immunorcpt_sig_ITAM.  | High expression: CD34,<br>endothelial and dendritic cells    | + [13,20] |
| IL6ST   | FN_III,<br>Hematopoietin_rcpt_gp130_CS,<br>Ig-like_fold, IgC2-like_lig-bd | Uniform expression                                           | + [21-23] |
| TNFRSF5 | Fas_rcpt, TNFR_Cys_rich_reg                                               | High expression: B lymphoblasts                              | + [24-26] |
| TNFRSF3 | TNFR_3_LTBR,<br>TNFR_Cys_rich_reg                                         | High expression: myeloid,<br>monocytes and whole blood       | + [27]    |

(\*): CD34, endothelial, B lymphoblasts, dendritic, myeloid, monocytes, NK, CD8 and CD4 T cells, whole blood

(+) Predictions with literature supporting an interaction with HIV are marked as (+).

(-) Indicates predictions with negative evidences.

(?) For predictions without literature on interaction or non-interaction the association remains unclear.

## References

1. Lachgar A, Jaureguiberry G, Buenac HL, Bizzini B, Zagury JF, Rappaport J, et al. **Binding of HIV-1 to RBCs involves the Duffy antigen receptors for chemokines (DARC).** *Biomed Pharmacother.* 1998; **52**(10):436–439.
2. Walton RT, Rowland-Jones SL. **HIV and chemokine binding to red blood cells–DARC matters.** *Cell Host Microbe.* 2008; **4**(1):3–5.
3. He W, Neil S, Kulkarni H, Wright E, Agan BK, Marconi VC, et al. **Duffy antigen receptor for chemokines mediates trans-infection of HIV-1 from red blood cells to target cells and affects HIV-AIDS susceptibility.** *Cell Host Microbe.* 2008; **4**(1):52–62.
4. Shimizu N, Tanaka A, Oue A, Mori T, Ohtsuki T, Apichartpiyakul C, et al. **Broad usage spectrum of G protein-coupled receptors as coreceptors by primary isolates of HIV.** *AIDS.* 2009; **27**(7):761–769.
5. McKnight A, Dittmar MT, Moniz-Periera J, Ariyoshi K, Reeves JD, Hibbitts S, et al. **A broad range of chemokine receptors are used by primary isolates of human immunodeficiency virus type 2 as coreceptors with CD4.** *J Virol.* 1998; **72**(5):4065–4071.
6. Utaipat U, Duerr A, Rudolph DL, Yang C, Butera ST, Lupo D, et al. **Coreceptor utilization of HIV type 1 subtype E viral isolates from Thai men with HIV type 1-infected and uninfected wives.** *AIDS Res Hum Retroviruses.* 2002; **18**(1):1–11.
7. Neil SJD, Aasa-Chapman MMI, Clapham PR, Nibbs RJ, McKnight A, Weiss RA. **The promiscuous CC chemokine receptor D6 is a functional coreceptor for primary isolates of human immunodeficiency virus type 1 (HIV-1) and HIV-2 on astrocytes.** *J Virol.* 2005; **79**(15):9618–9624.
8. Shimizu N, Tanaka A, Oue A, Mori T, Apichartpiyakul C, Hoshino H. **A short amino acid sequence containing tyrosine in the N-terminal region of G protein-coupled receptors is critical for their potential use as co-receptors for human and simian immunodeficiency viruses.** *J Gen Virol.* 2008; **89**(Pt 12):3126–3136.
9. Nibbs RJ, Wylie SM, Yang J, Landau NR, Graham GJ. **Cloning and characterization of a novel promiscuous human beta-chemokine receptor D6.** *J Biol Chem.* 1997; **272**(51):32078–32083.
10. Zhou H, Xu M, Huang Q, Gates AT, Zhang XD, Castle JC, et al. **Genome-scale RNAi screen for host factors required for HIV replication.** *Cell Host Microbe.* 2008; **4**(5):495–504.
11. Efremov R, Truong MJ, Darcissac EC, Zeng J, Grau O, Vergoten G, et al. **Human chemokine receptors CCR5, CCR3 and CCR2B share common polarity motif in the first extracellular loop with other human G-protein coupled receptors implications for HIV-1 coreceptor function.** *Eur J Biochem.* 1999; **263**(3):746–756.

12. Meuer SC, Hussey RE, Fabbi M, Fox D, Acuto O, Fitzgerald KA, et al. **An alternative pathway of T-cell activation: a functional role for the 50 kd T11 sheep erythrocyte receptor protein.** *Cell*. 1984; **36**(4):897–906.
13. Shen A, Yang H, Zhou Y, Chase AJ, Boyer JD, Zhang H, et al. **Novel pathway for induction of latent virus from resting CD4<sup>+</sup>T cells in the simian immunodeficiency virus/macaque model of human immunodeficiency virus type 1 latency.** *J Virol*. 2007; **81**(4):1660–1670.
14. Bressler P, Pantaleo G, Demaria A, Fauci AS. **Anti-CD2 receptor antibodies activate the HIV long terminal repeat in T lymphocytes.** *J Immunol*. 1991; **147**(7):2290–2294.
15. Wu JQ, Dyer WB, Chrisp J, Belov L, Wang B, Saksena NK. **Longitudinal microarray analysis of cell surface antigens on peripheral blood mononuclear cells from HIV+ individuals on highly active antiretroviral therapy.** *Retrovirology*. 2008; **5**:24.
16. Dunn SJ, Khan IH, Chan UA, Searce RL, Melara CL, Paul AM, et al. **Identification of cell surface targets for HIV-1 therapeutics using genetic screens.** *Virology*. 2004; **321**(2):260–273.
17. Rapaport R, McLean C, Campbell T. **Filgrastim Stimulates HIV-1 Replication in Monocytoid Cells..** In: *Program Abstr Conf Retrovir Oppor Infect 11th 2004 San Franc Calif*; 2004.
18. Wang C, Song W, Lobashevsky E, Wilson CM, Douglas SD, Mytilineos J, et al. **Cytokine and chemokine gene polymorphisms among ethnically diverse North Americans with HIV-1 infection.** *J Acquir Immune Defic Syndr*. 2004; **35**(5):446–454.
19. Do H, Vasilescu A, Carpentier W, Meyer L, Diop G, Hirtzig T, et al. **Exhaustive genotyping of the interleukin-1 family genes and associations with AIDS progression in a French cohort.** *J Infect Dis*. 2006; **194**(11):1492–1504.
20. Nance CL, Shearer WT. **SDF-1alpha regulates HIV-1-gp120-induced changes in CD79b surface expression and Ig production in activated human B cells.** *Clin Immunol*. 2002; **105**(2):208–214.
21. Macal M, Sankaran S, Chun T, Reay E, Flamm J, Prindiville TJ, et al. **Effective CD4<sup>+</sup> T-cell restoration in gut-associated lymphoid tissue of HIV-infected patients is associated with enhanced Th17 cells and polyfunctional HIV-specific T-cell responses.** *Mucosal Immunol*. 2008; **1**(6):475–488.
22. Brenchley JM, Paiardini M, Knox KS, Asher AI, Cervasi B, Asher TE, et al. **Differential Th17 CD4 T-cell depletion in pathogenic and nonpathogenic lentiviral infections.** *Blood*. 2008; **112**(7):2826–2835.
23. Ndhlovu LC, Chapman JM, Jha AR, Snyder-Cappione JE, Pagán M, Leal FE, et al. **Suppression of HIV-1 plasma viral load below detection preserves IL-17 producing T cells in HIV-1 infection.** *AIDS*. 2008; **22**(8):990–992.

24. Vanham G, Penne L, Devalck J, Kestens L, Colebunders R, Bosmans E, et al. **Decreased CD40 ligand induction in CD4 T cells and dysregulated IL-12 production during HIV infection.** *Clin Exp Immunol.* 1999; **117**(2):335–342.
25. Martin G, Roy J, Barat C, Ouellet M, Gilbert C, Tremblay MJ. **Human immunodeficiency virus type 1-associated CD40 ligand transactivates B lymphocytes and promotes infection of CD4+ T cells.** *J Virol.* 2007; **81**(11):5872–5881.
26. Maurais E, Cantin R, Tremblay MJ. **Human immunodeficiency virus type 1-anchored CD40 ligand induces secretion of the chemokine interleukin-8 by human primary macrophages.** *Virology.* 2009; **385**(1):227–232.
27. Marshall WL, Brinkman BM, Ambrose CM, Pesavento PA, Ugliarolo AM, Teng E, et al. **Signaling through the lymphotoxin-beta receptor stimulates HIV-1 replication alone and in cooperation with soluble or membrane-bound TNF-alpha.** *J Immunol.* 1999; **162**(10):6016–6023.
